# Supplementary material for: Screening of a Novel Lactiplantibacillus plantarum MMB-05 and Lacticaseibacillus casei Fermented Sandwich Seaweed Scraps: Chemical Composition, In Vitro Antioxidant, and Volatile Compounds Analysis by GC-IMS
Source: MDPI journal article supplement (doi:10.3390/foods11182875), 2022-09-16
Supplement: s1 [file s1]

**Screening of a Novel *Lactiplantibacillus plantarum* MMB-05 and *Lacticaseibacillus casei* Fermented Sandwich Seaweed Scraps: Chemical Composition, *In Vitro* Antioxidant, and Volatile Compounds Analysis by GC-IMS**

Tengqi Gao<sup>1, 2</sup>, Jinling Chen<sup>1</sup>, Jie Xu<sup>3</sup>, Han Gu<sup>1</sup>, Pengpeng Zhao<sup>1</sup>, Wenbin Wang<sup>1, 2</sup>, Saikun Pan<sup>1, 2</sup>, Yang Tao<sup>4</sup>, Hongli Wang<sup>1</sup>, Jie Yang<sup>1, 2\*</sup>

<sup>1</sup>Jiangsu Key Laboratory of Marine Bioresources and Environment/Jiangsu Key Laboratory of Marine Biotechnology, Jiangsu Ocean University, Lianyungang, 222005, China

<sup>2</sup>Co-Innovation Center of Jiangsu Marine Bio-industry Technology, Jiangsu Ocean University, Lianyungang 222005, China

<sup>3</sup>Anqiu Agricultural Product Quality and Safety Management Service Center, AnQiu, 262100, China

<sup>4</sup>College of Food Science and Technology, Nanjing Agricultural University, 1 Weigang, Nanjing 210095, China

\*Corresponding authors:

1. Hongli Wang, Email: 18221338903@163.com

Jiangsu Key Laboratory of Marine Bioresources and Environment/Jiangsu Key Laboratory of Marine Biotechnology, Jiangsu Ocean University, Lianyungang, 222005, China

2. Jie Yang, Email: yangjie0737@163.com

Jiangsu Key Laboratory of Marine Bioresources and Environment/Jiangsu Key Laboratory of Marine Biotechnology, Jiangsu Ocean University, Lianyungang, 222005, China

Table S1. Changes of viable cell counts in *P. yezoensis* sauce fermentation with different LAB strains.

| Numbers | viable cell counts (Log CFU/mL) |              |              |              |
|---------|---------------------------------|--------------|--------------|--------------|
|         | 0 h                             | 24 h         | 72 h         | 96 h         |
| L1      | 6.75 ± 0.03                     | 8.45 ± 0.03  | 9.86 ± 0.04  | 8.37 ± 0.04  |
| L2      | 6.22 ± 0.13                     | 8.66 ± 0.07  | 9.71 ± 0.12  | 8.48 ± 0.06  |
| L3      | 6.35 ± 0.01                     | 9.03 ± 0.11  | 9.98 ± 0.05  | 8.36 ± 0.07  |
| L4      | 6.98 ± 0.02                     | 9.34 ± 0.09  | 10.65 ± 0.06 | 9.14 ± 0.09  |
| MMB-05  | 7.01 ± 0.18                     | 13.11 ± 0.06 | 11.92 ± 0.11 | 11.43 ± 0.08 |
| L6      | 7.61 ± 0.12                     | 10.16 ± 0.04 | 11.24 ± 0.03 | 10.13 ± 0.03 |
| L7      | 7.33 ± 0.02                     | 9.56 ± 0.01  | 10.97 ± 0.04 | 9.57 ± 0.08  |
| L8      | 6.78 ± 0.09                     | 8.85 ± 0.05  | 9.82 ± 0.02  | 8.32 ± 0.05  |
| L9      | 6.45 ± 0.12                     | 8.63 ± 0.05  | 9.77 ± 0.02  | 8.67 ± 0.11  |
| L10     | 7.15 ± 0.03                     | 9.01 ± 0.02  | 10.01 ± 0.01 | 9.13 ± 0.04  |

Values are expressed as averages ± standard deviation (n = 3).

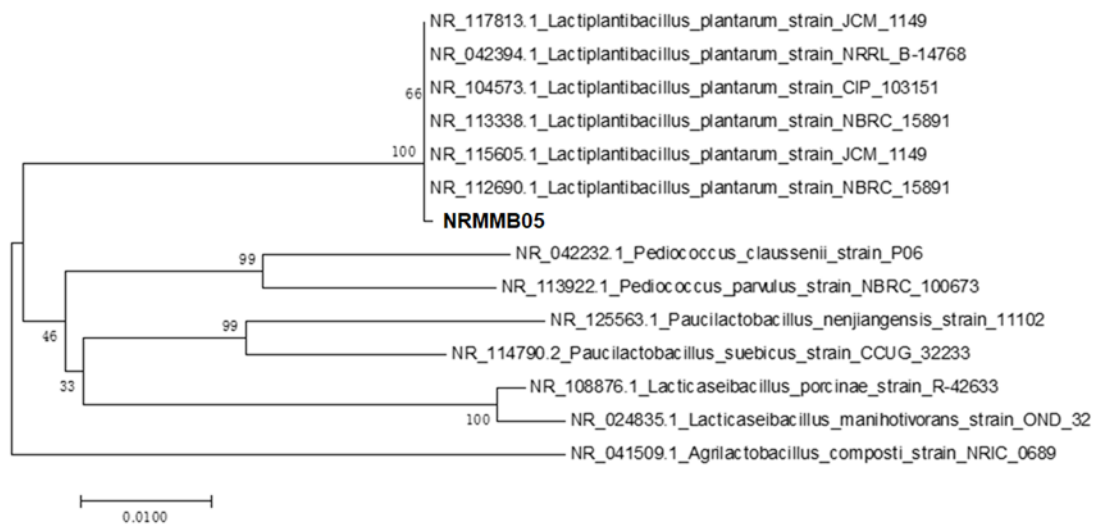

Figure S1. Phylogenetic tree of *L. plantarum* MMB-05 based on 16S rRNA gene sequences.

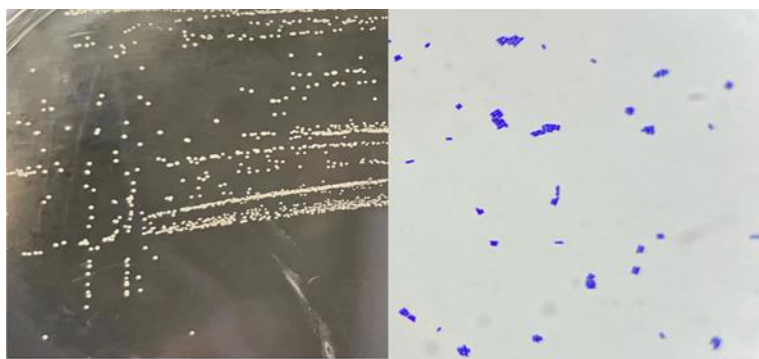

Figure S2. Colony morphology and Gram staining of *L. plantarum* MMB-05.
